# Supplementary material
Source: PubMed Central journal article supplement (PMC7956224)

**A**

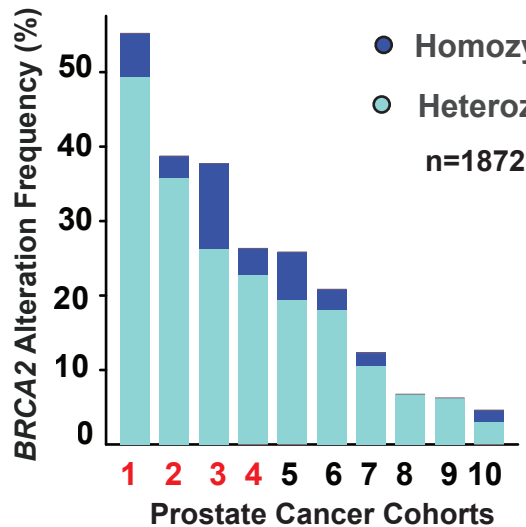

- 1: FHCRC (Kumar) 2016; mCRPC
- 2: SU2C 2019; mCRPC
- 3: UMich 2012; mCRPC
- 4: Multi-Institute 2016; NEPC
- 5: TCGA (Firehose Legacy) ; Primary
- 6: MSK 2010; Primary/Metastatic\*
- 7: Broad/Cornell 2013; Primary
- 8: MSK 2014; Primary
- 9: Broad/Cornell 2012; Primary
- 10: SMMU 2017; Primary

**B**

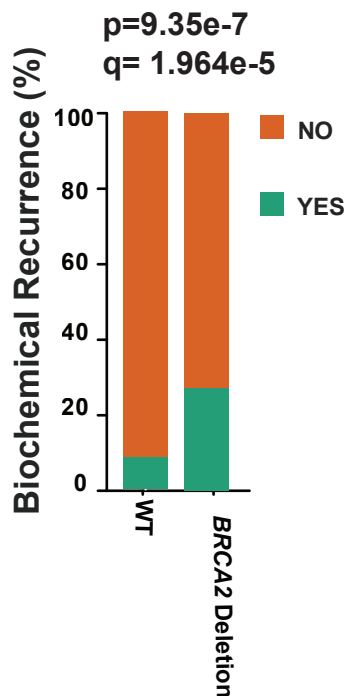

**C**

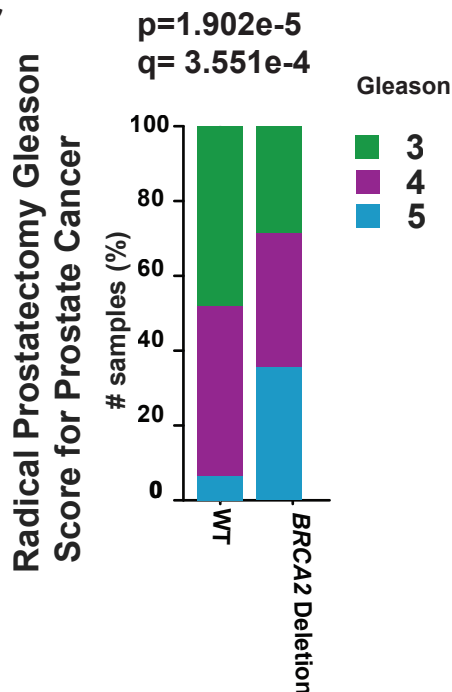

**D**

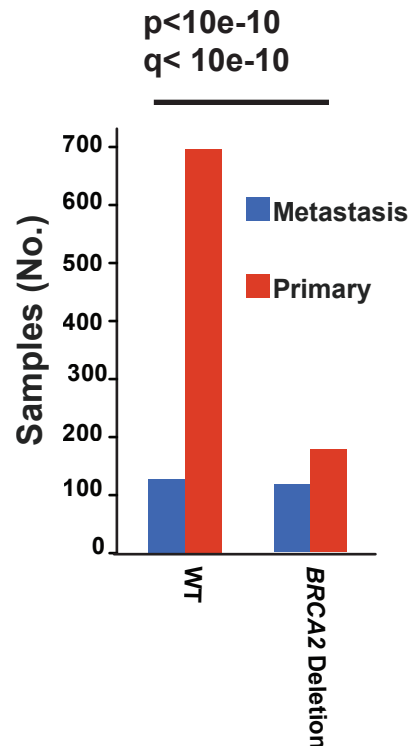

**E**

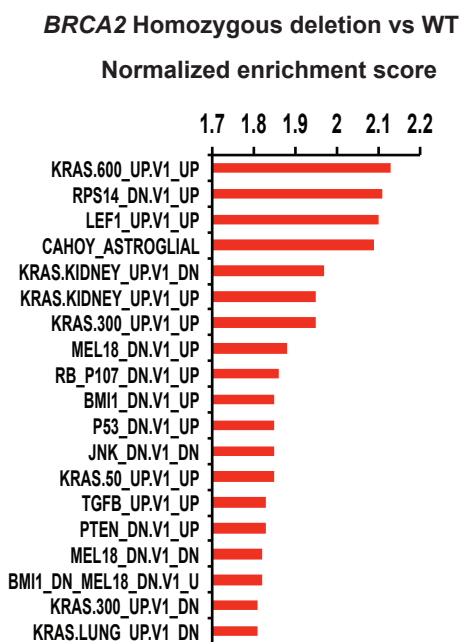

**F**

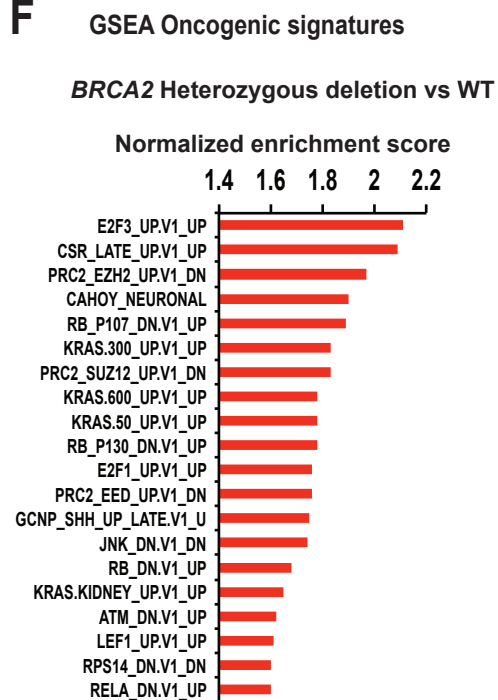

**G**

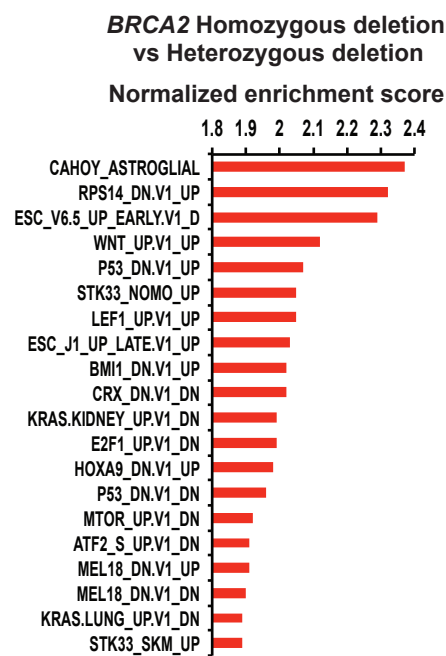

Supplement: NIHMS1656559-supplement-3.pdf [file NIHMS1656559-supplement-3.pdf]
