# Supplementary material
Source: PubMed Central journal article supplement (PMC7956224)

**A****PC3M cells dasatinib: talazoparib: 10:1 ( $\mu\text{M}$ )**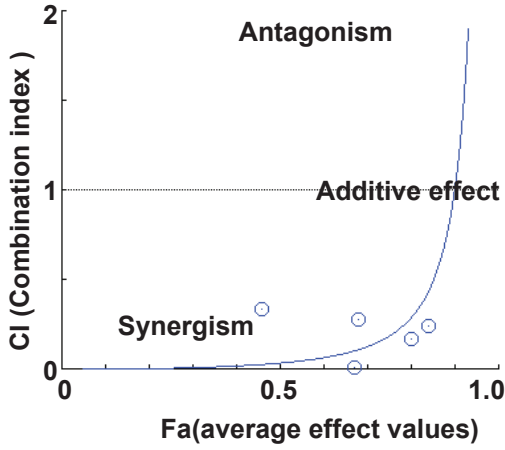

| Dasatinib ( $\mu\text{M}$ ) | Talazoparib ( $\mu\text{M}$ ) | Total Dose( $\mu\text{M}$ ) | Fa   | CI Value |
|-----------------------------|-------------------------------|-----------------------------|------|----------|
| 0.03                        | 0.003                         | 0.033                       | 0.46 | 0.33997  |
| 0.10                        | 0.010                         | 0.11                        | 0.67 | 0.01063  |
| 0.30                        | 0.030                         | 0.33                        | 0.68 | 0.28178  |
| 1.0                         | 0.10                          | 1.1                         | 0.8  | 0.16896  |
| 3.0                         | 0.30                          | 3.3                         | 0.84 | 0.24335  |

**B****LNCaP-abl cells olaparib: dasatinib, 10:1 ( $\mu\text{M}$ )**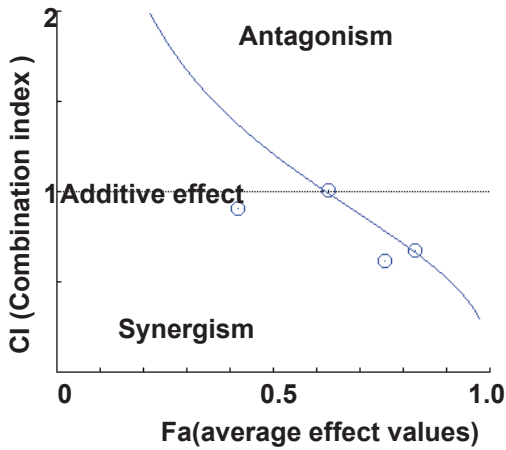

| DASA | OLA  | CI Value |
|------|------|----------|
| 0.01 | 0.10 | 0.91232  |
| 0.03 | 0.30 | 2.46358  |
| 0.10 | 1.0  | 1.01258  |
| 0.30 | 3.0  | 0.61643  |
| 1.0  | 10.0 | 0.67532  |

**C****LNCaP-abl**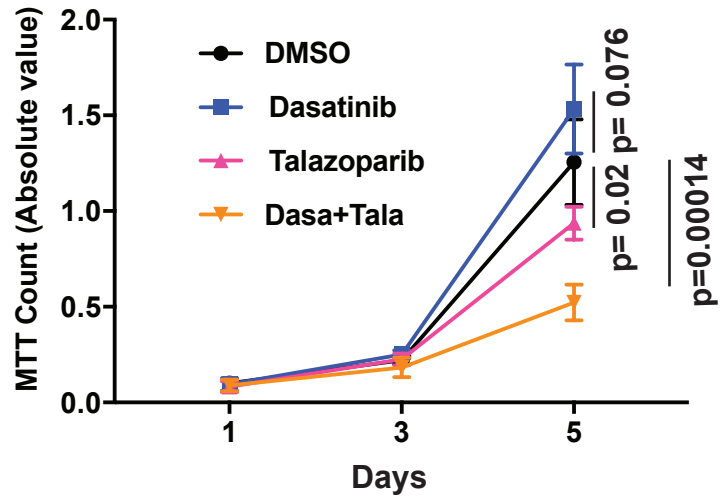**D****LNCaP-abl**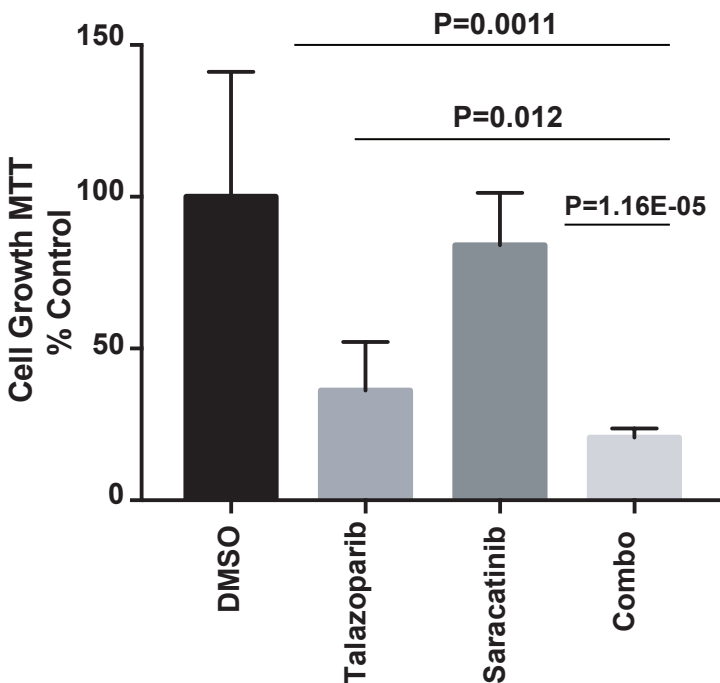**E****PC3M**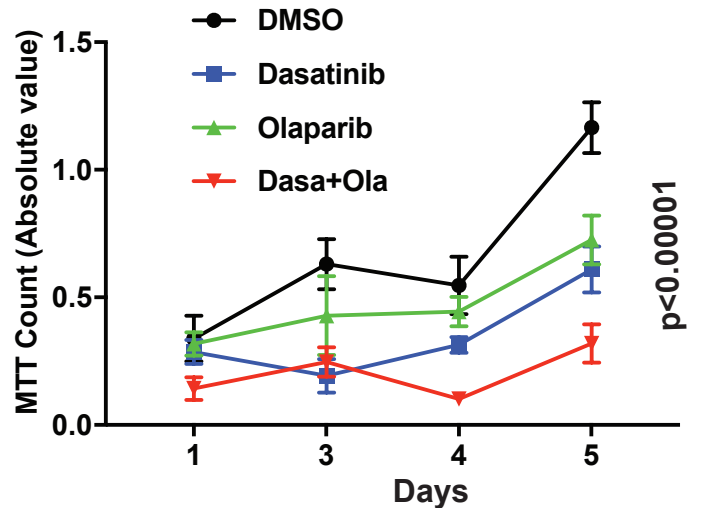

Supplement: NIHMS1656559-supplement-5.pdf [file NIHMS1656559-supplement-5.pdf]
