# Supplementary material
Source: PubMed Central journal article supplement (PMC7956224)
Supplement: NIHMS1656559-supplement-6.pdf [file NIHMS1656559-supplement-6.pdf]

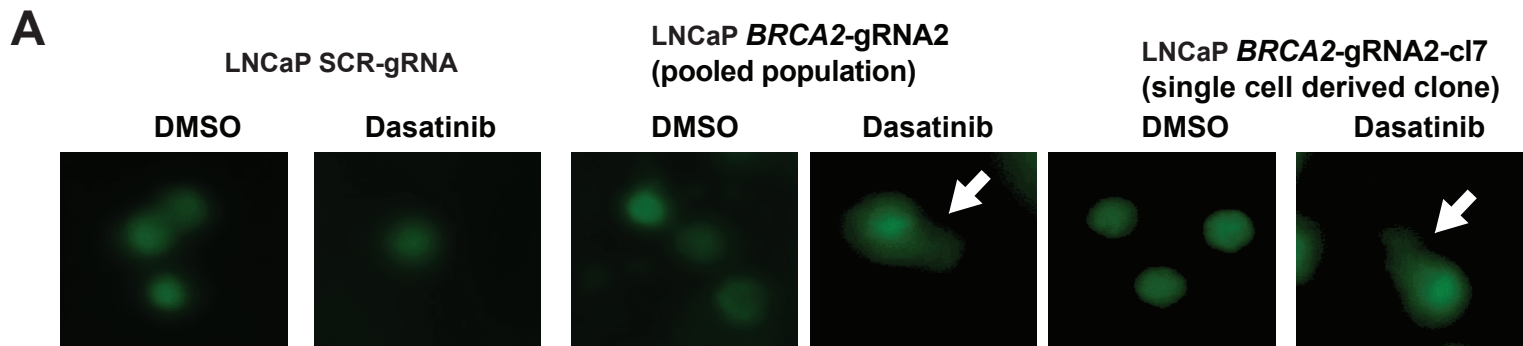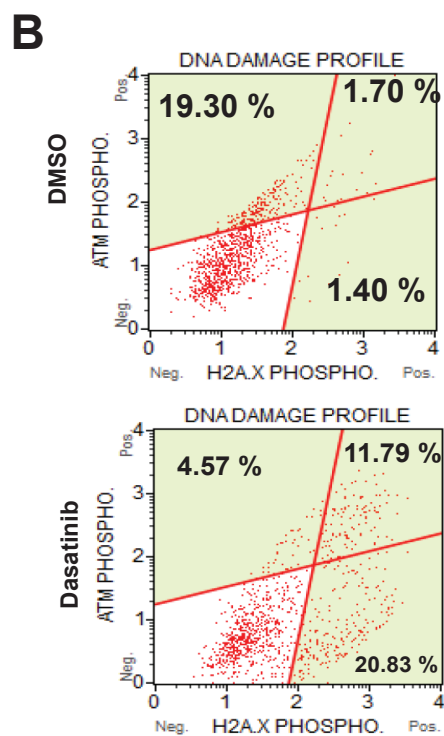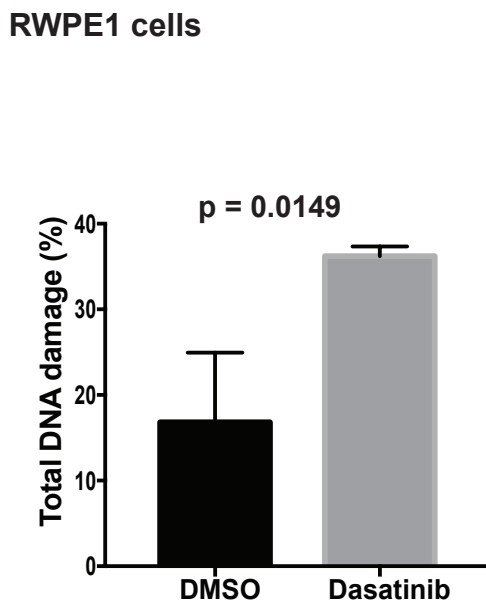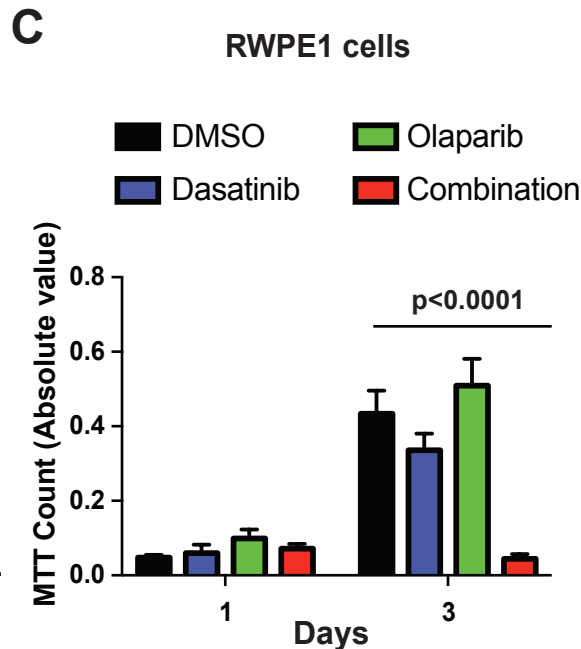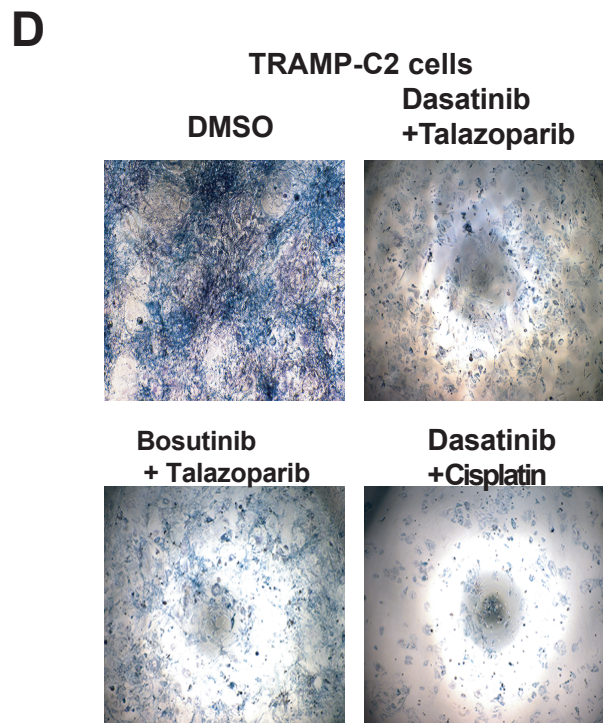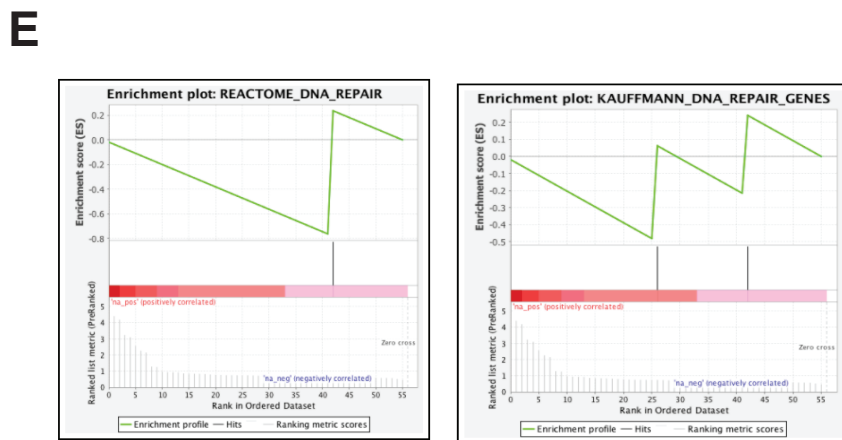

| GS | GS DETAILS                                 | SIZE                        | ES | NES   | NOM p-val | FDR q-val | FWER p-val | RANK AT MAX | LEADING EDGE |                                  |
|----|--------------------------------------------|-----------------------------|----|-------|-----------|-----------|------------|-------------|--------------|----------------------------------|
| 1  | <a href="#">GO DNA REPAIR</a>              | <a href="#">Details ...</a> | 2  | 0.50  | 0.79      | 0.741     | 0.769      | 0.809       | 9            | tags=50%, list=16%, signal=57%   |
| 1  | <a href="#">REACTOME_DNA_REPAIR</a>        | <a href="#">Details ...</a> | 1  | -0.76 | -1.01     | 0.461     | 0.936      | 0.500       | 15           | tags=100%, list=27%, signal=134% |
| 2  | <a href="#">KAUFFMANN_DNA_REPAIR_GENES</a> | <a href="#">Details ...</a> | 2  | -0.48 | -0.88     | 0.596     | 0.648      | 0.640       | 31           | tags=100%, list=55%, signal=216% |
