# Supplementary material
Source: PubMed Central journal article supplement (PMC7956224)
Supplement: NIHMS1656559-supplement-7.pdf [file NIHMS1656559-supplement-7.pdf]

**A.****Experiment Fig 5B- PC3M cells****96 well plate**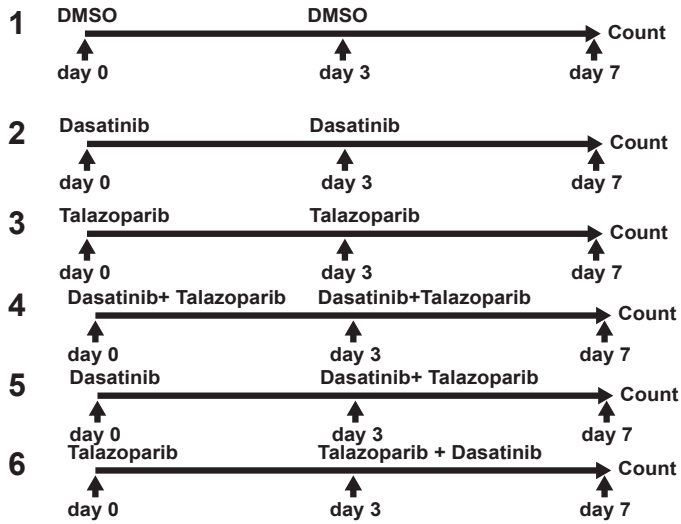**DMSO****Dasatinib****Talazoparib**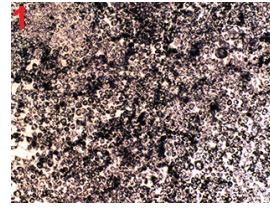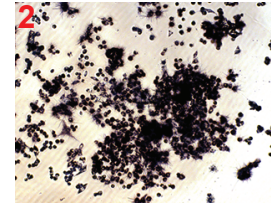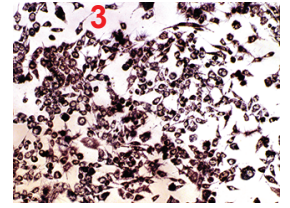**Dasatinib + talazoparib****Treatment from Day 0****Dasatinib + Talazoparib****Talazoparib + Dasatinib**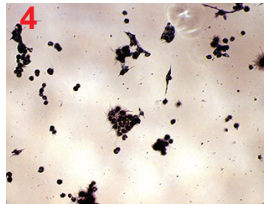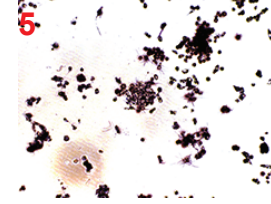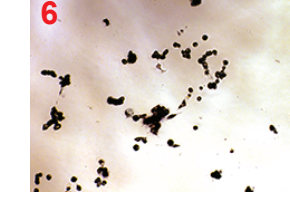**Dasatinib 0.3  $\mu$ M; Talazoparib 0.03  $\mu$ M****B****Experiment Fig 5C PC3M cells**

Experiment No.

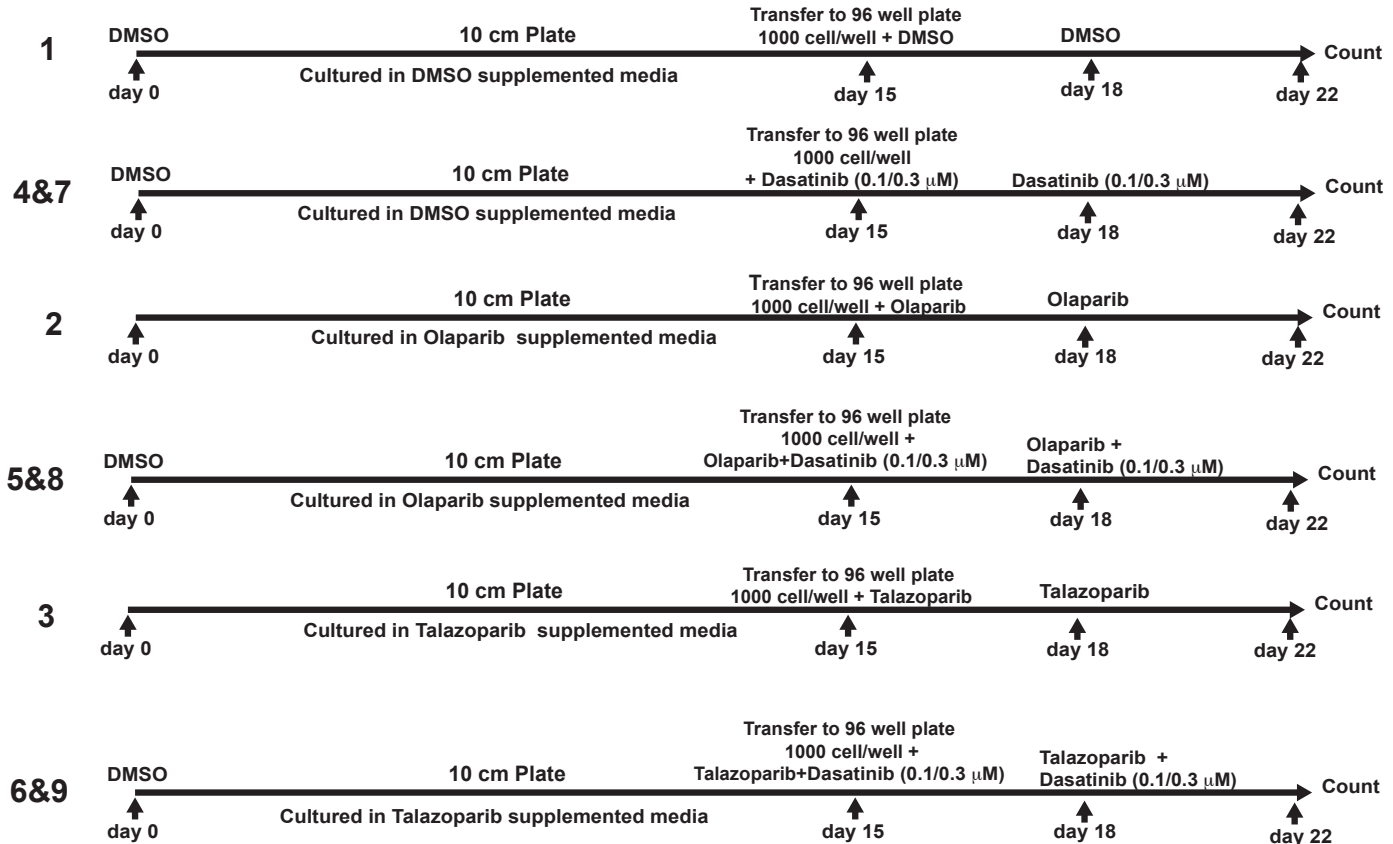**Dasatinib 0.3  $\mu$ M; Talazoparib 0.03  $\mu$ M; Olaparib 3  $\mu$ M**
