# Supplementary material
Source: PubMed Central journal article supplement (PMC7956224)

# A. Schematic representation of Fig 6

LNCaP-abl 5000 cells/ Well 24 well plate  
PC3M 1000 cells/ Well 24 well plate

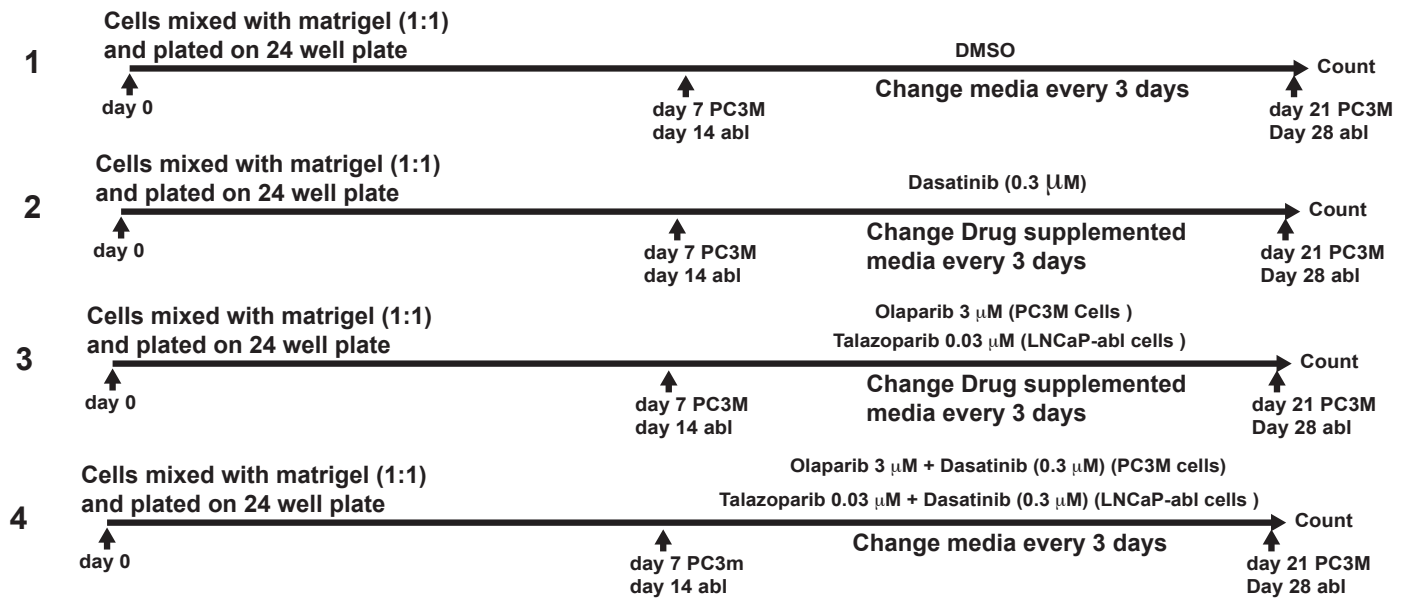

# B

## LNCaP-abl Organoid

DMSO

Talazoparib

Dasatinib

Combination

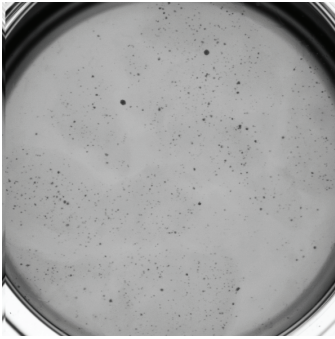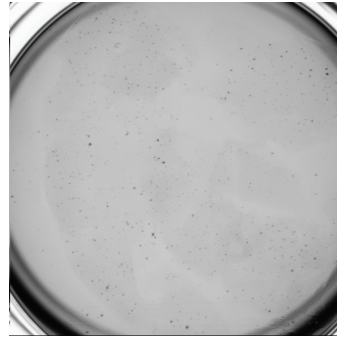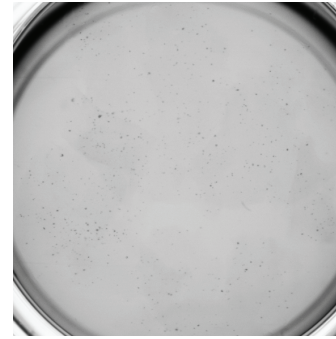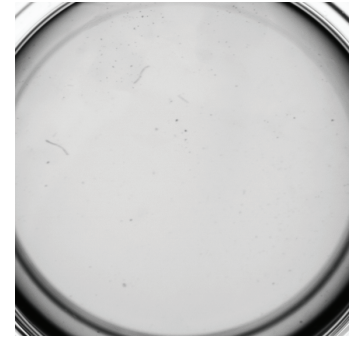

# C

DMSO

Talazoparib

Dasatinib

Combination

## MSKPCa1 2D cell growth 7 day

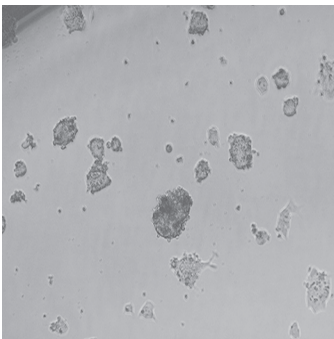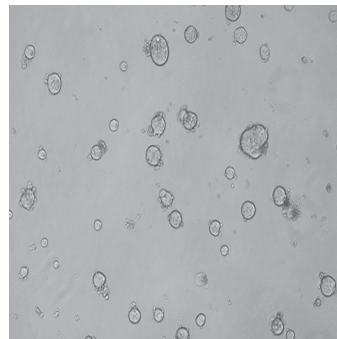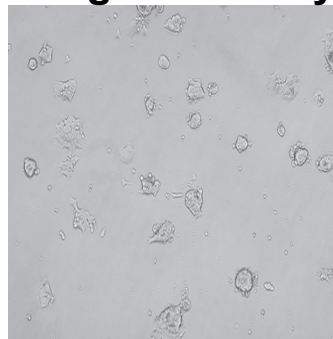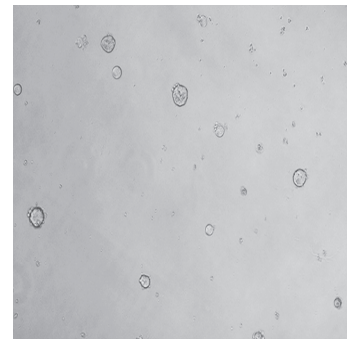

## MSKPCa3 2D cell growth 7 day

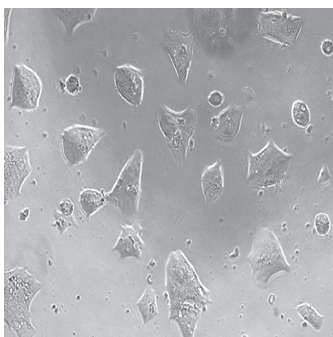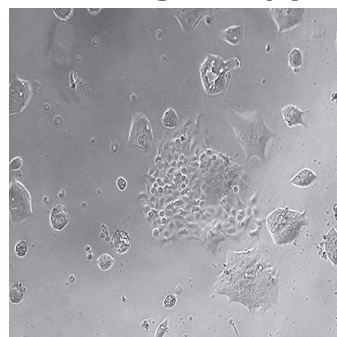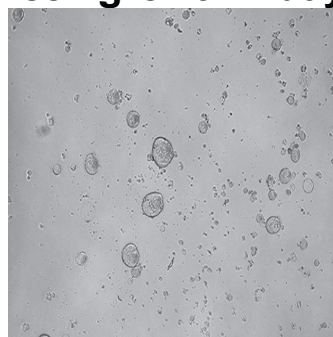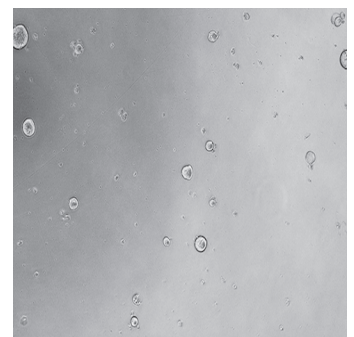

Supplement: NIHMS1656559-supplement-8.pdf [file NIHMS1656559-supplement-8.pdf]
