# Supplementary material
Source: PubMed Central journal article supplement (PMC7956224)

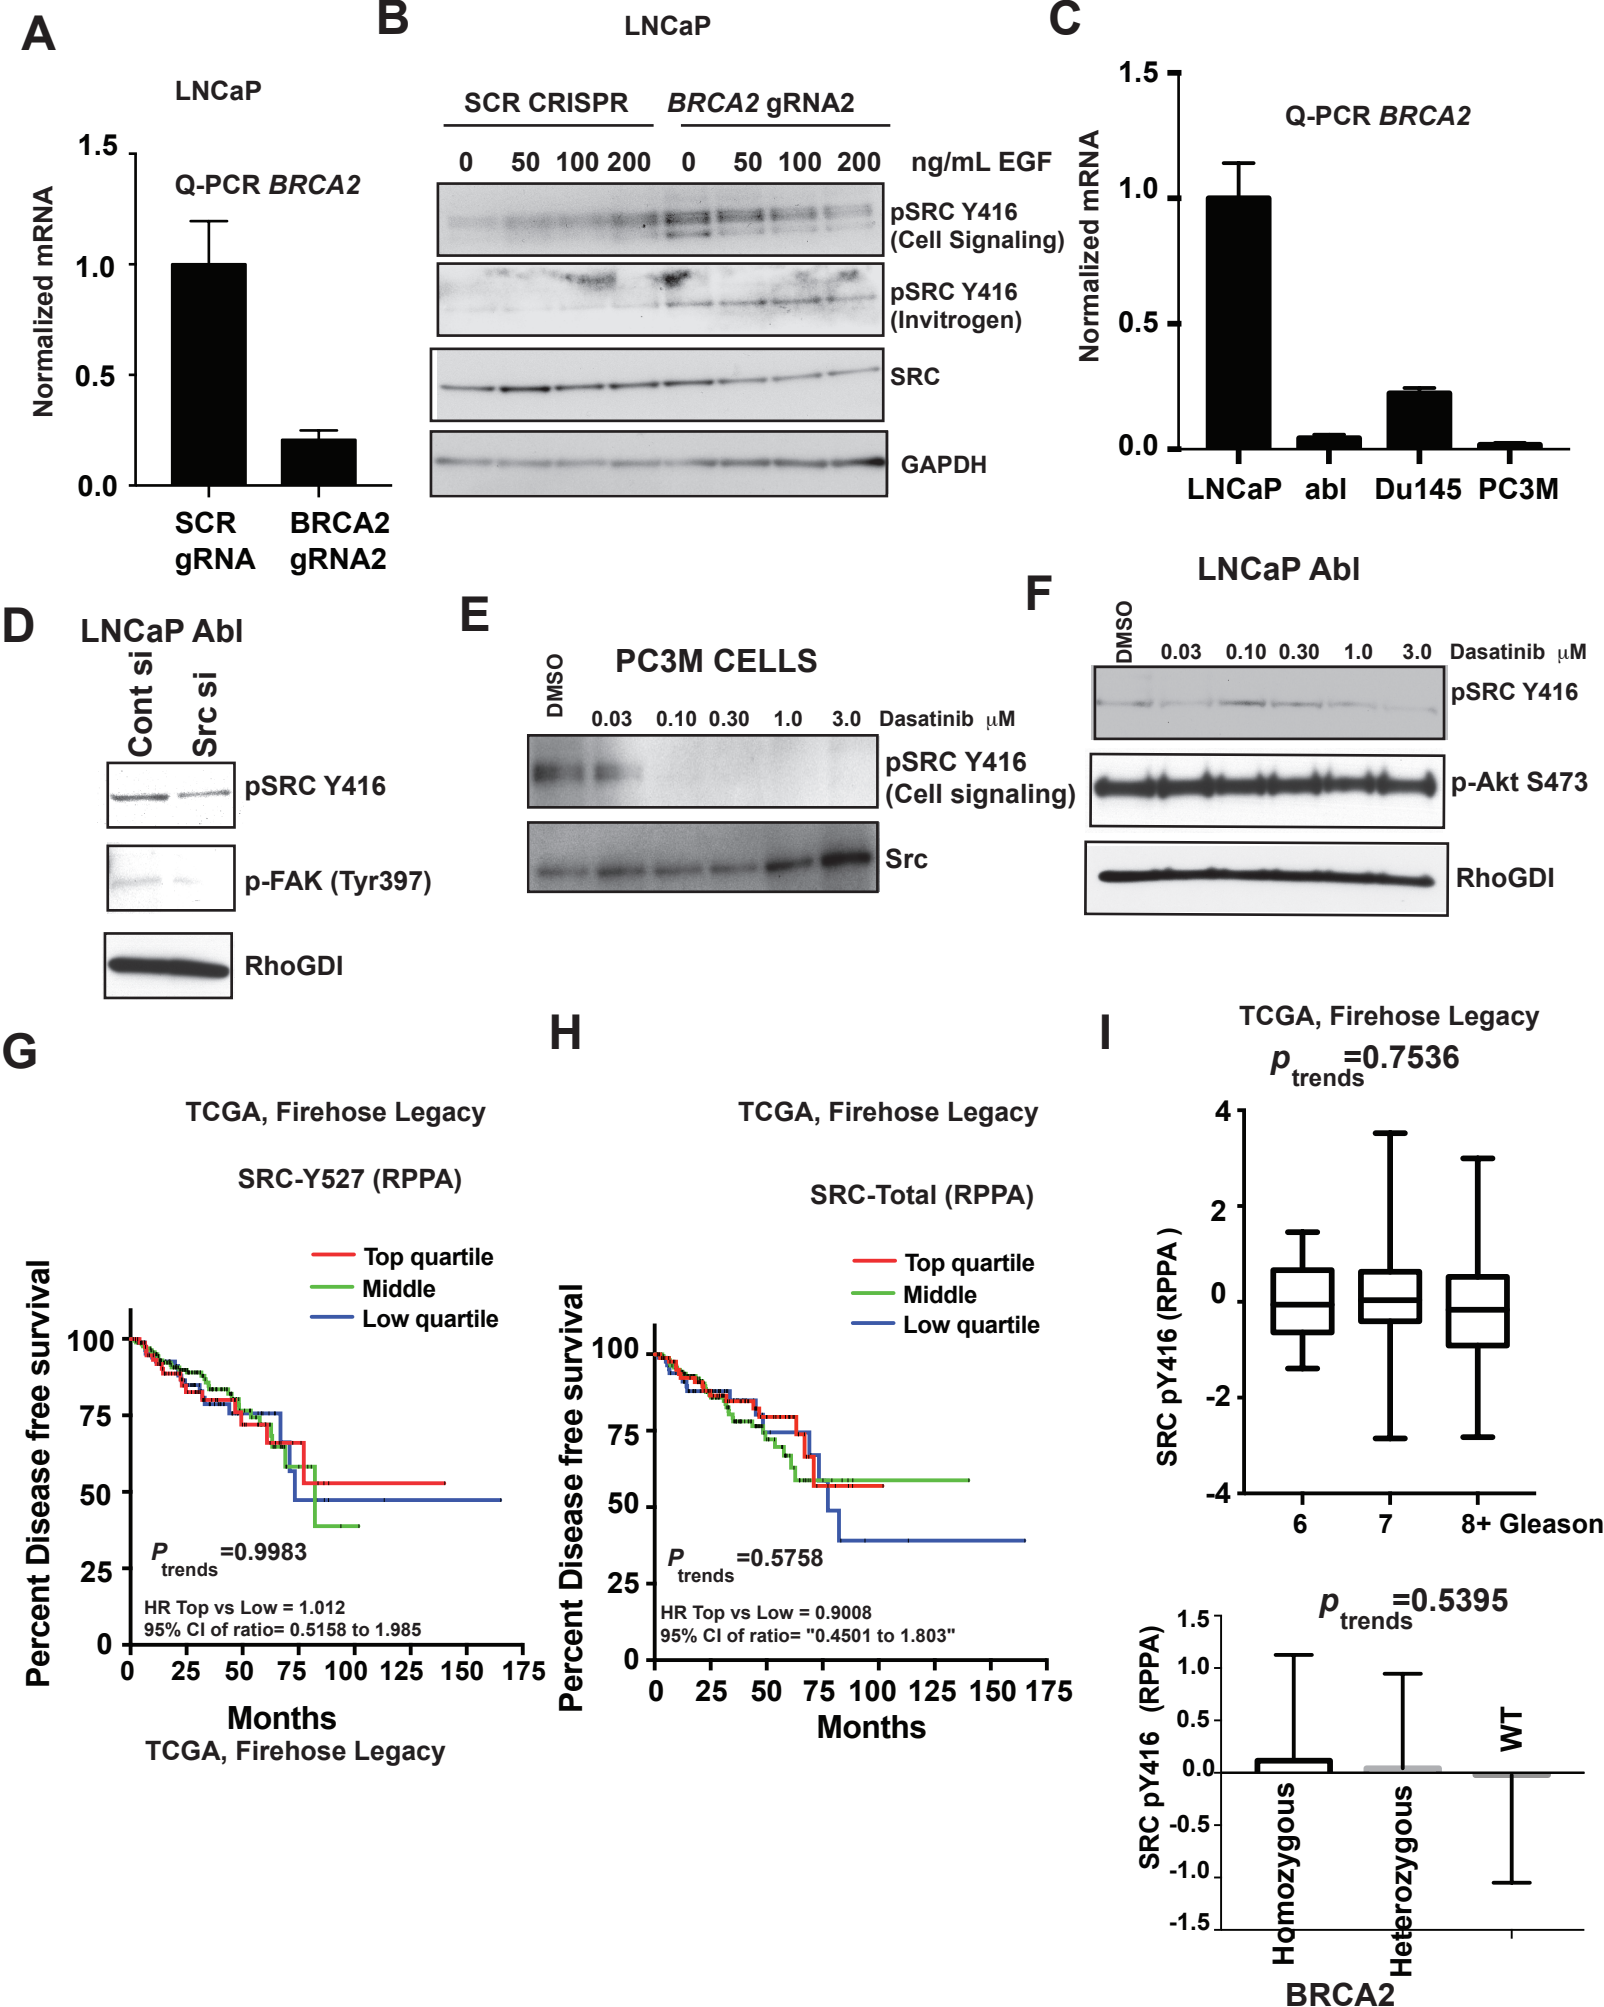

Supplementary Figure 2

Supplement: NIHMS1656559-supplement-4.pdf [file NIHMS1656559-supplement-4.pdf]
